# Supplementary material for: Potent inhibitors targeting cyclin-dependent kinase 9 discovered via virtual high-throughput screening and absolute binding free energy calculations
Source: Royal Society of Chemistry journal article supplement (doi:10.1039/d3cp05582e), 2024-01-01
Supplement: d3cp05582e1.pdf [file d3cp05582e1.pdf]

## *Supporting Information*

### **Potent inhibitors targeting Cyclin-dependent kinase 9 discovered via high-throughput virtual screening and absolute binding free energy calculations**

Shipeng Wang<sup>a</sup>, Fengjiao Liu<sup>a\*</sup>, Pengfei Li<sup>b</sup>, Jia-Ning Wang<sup>c</sup>, Yan Mo<sup>c,d,e</sup>, Bin Lin<sup>f,\*</sup>,  
Ye Mei<sup>c,d,e</sup>

<sup>a</sup>School of Chemistry and Chemical Engineering, Shanghai University of Engineering Science, Shanghai 201620, China

<sup>b</sup>Single Particle, LLC, 10531 4S Commons Dr. 166-629, San Diego, CA 92127, United States

<sup>c</sup>State Key Laboratory of Precision Spectroscopy, School of Physics and Electronic Science, East China Normal University, Shanghai 200241, China

<sup>d</sup>NYU-ECNU Center for Computational Chemistry at NYU Shanghai, Shanghai 200062, China

<sup>e</sup>Collaborative Innovation Center of Extreme Optics, Shanxi University, Taiyuan, Shanxi 030006, China

<sup>f</sup>Wuya College of Innovation, Shenyang Pharmaceutical University, Shenyang 110016, China

**Email: [fjliu@sues.edu.cn](mailto:fjliu@sues.edu.cn); [randybinlin@gmail.com](mailto:randybinlin@gmail.com)**

**Table S1. Setup of MD Simulations.**

| Simulation type | /                   | /                                                                                                                                                                                                                  |
|-----------------|---------------------|--------------------------------------------------------------------------------------------------------------------------------------------------------------------------------------------------------------------|
| Conventional    | Ensemble            | NPT                                                                                                                                                                                                                |
|                 | Simulation time     | 100 ns                                                                                                                                                                                                             |
|                 | Time step           | 2 fs                                                                                                                                                                                                               |
|                 | total atomic number | ~75500                                                                                                                                                                                                             |
| Alchemical      | $\lambda$ -windows  | Restraint: 0.0, 0.01, 0.025, 0.05, 0.075, 0.1, 0.15, 0.2, 0.35, 0.5, 0.75, 1.0<br>Ligand in complex: 0.0, 0.01, 0.025, 0.05, 0.075, 0.1, 0.15, 0.2, 0.3, 0.4, 0.5, 0.6, 0.65, 0.7, 0.75, 0.8, 0.85, 0.9, 0.95, 1.0 |
|                 | Ensemble            | NPT                                                                                                                                                                                                                |
|                 | Simulation time     | 1 ns * 32                                                                                                                                                                                                          |
|                 | Time step           | 1 fs                                                                                                                                                                                                               |
|                 | Restraint type      | Boresch-restraint                                                                                                                                                                                                  |

**Table S2.** Top 200 docking molecules from Zinc15 database. The red-highlighted Rank ID indicates the existence of hydrogen bonding in the docking conformation with the hinge region of CDK9.

| Rank | ZINC ID          | Vina docking score (kcal/mol) |
|------|------------------|-------------------------------|
| 001  | ZINC000095869672 | -14.642                       |
| 002  | ZINC000012377403 | -14.608                       |
| 003  | ZINC000218224996 | -13.017                       |
| 004  | ZINC000020477868 | -12.726                       |
| 005  | ZINC000253534673 | -12.644                       |
| 006  | ZINC000020477880 | -12.414                       |
| 007  | ZINC000006763566 | -12.296                       |
| 008  | ZINC000095916638 | -12.285                       |
| 009  | ZINC000100643778 | -12.251                       |
| 010  | ZINC000015218322 | -12.146                       |
| 011  | ZINC000005853248 | -12.114                       |
| 012  | ZINC000085776324 | -11.864                       |
| 013  | ZINC000095916633 | -11.844                       |
| 014  | ZINC000057497264 | -11.842                       |
| 015  | ZINC000085776320 | -11.834                       |
| 016  | ZINC000217379534 | -11.834                       |
| 017  | ZINC000253629646 | -11.829                       |
| 018  | ZINC000226860140 | -11.767                       |
| 019  | ZINC000095916637 | -11.766                       |
| 020  | ZINC000409402836 | -11.751                       |
| 021  | ZINC000409352511 | -11.742                       |
| 022  | ZINC000085776323 | -11.726                       |
| 023  | ZINC000004027396 | -11.703                       |
| 024  | ZINC000057497261 | -11.681                       |
| 025  | ZINC000408721756 | -11.663                       |
| 026  | ZINC000095916634 | -11.625                       |
| 027  | ZINC000094156261 | -11.619                       |
| 028  | ZINC000033784438 | -11.615                       |
| 029  | ZINC000022001476 | -11.614                       |
| 030  | ZINC000004416776 | -11.610                       |
| 031  | ZINC000009357335 | -11.596                       |
| 032  | ZINC000095916626 | -11.592                       |
| 033  | ZINC000104014035 | -11.549                       |
| 034  | ZINC000019332604 | -11.536                       |
| 035  | ZINC000100511559 | -11.525                       |
| 036  | ZINC000138162479 | -11.524                       |
| 037  | ZINC000100162583 | -11.519                       |
| 038  | ZINC000104301950 | -11.518                       |
| 039  | ZINC000004706349 | -11.507                       |

|     |                  |         |
|-----|------------------|---------|
| 040 | ZINC000044138285 | -11.507 |
| 041 | ZINC000085776327 | -11.506 |
| 042 | ZINC000004611090 | -11.489 |
| 043 | ZINC000005753111 | -11.485 |
| 044 | ZINC000020673951 | -11.482 |
| 045 | ZINC000006417103 | -11.477 |
| 046 | ZINC000409136801 | -11.477 |
| 047 | ZINC000020477910 | -11.473 |
| 048 | ZINC000020673948 | -11.468 |
| 049 | ZINC000013549435 | -11.460 |
| 050 | ZINC000004006341 | -11.458 |
| 051 | ZINC000100643779 | -11.456 |
| 052 | ZINC000409359730 | -11.435 |
| 053 | ZINC000588225119 | -11.430 |
| 054 | ZINC000016952802 | -11.430 |
| 055 | ZINC000001027893 | -11.419 |
| 056 | ZINC000094156260 | -11.415 |
| 057 | ZINC000409348728 | -11.407 |
| 058 | ZINC000005554236 | -11.385 |
| 059 | ZINC000409363068 | -11.370 |
| 060 | ZINC000225683042 | -11.366 |
| 061 | ZINC001554504429 | -11.356 |
| 062 | ZINC000096269095 | -11.344 |
| 063 | ZINC000409358646 | -11.344 |
| 064 | ZINC000409353839 | -11.338 |
| 065 | ZINC000409354366 | -11.337 |
| 066 | ZINC000409351662 | -11.334 |
| 067 | ZINC000005853513 | -11.331 |
| 068 | ZINC000001636607 | -11.331 |
| 069 | ZINC000008653206 | -11.329 |
| 070 | ZINC000008653207 | -11.329 |
| 071 | ZINC000409357147 | -11.327 |
| 072 | ZINC000003843479 | -11.325 |
| 073 | ZINC000020673341 | -11.320 |
| 074 | ZINC000020673338 | -11.320 |
| 075 | ZINC000012551619 | -11.319 |
| 076 | ZINC000032506883 | -11.313 |
| 077 | ZINC000004721192 | -11.310 |
| 078 | ZINC000061999358 | -11.301 |
| 079 | ZINC000104278237 | -11.299 |
| 080 | ZINC000100133448 | -11.292 |
| 081 | ZINC000408902610 | -11.291 |
| 082 | ZINC000015133646 | -11.290 |

|     |                  |         |
|-----|------------------|---------|
| 083 | ZINC000005376013 | -11.285 |
| 084 | ZINC000014921305 | -11.283 |
| 085 | ZINC000021981448 | -11.271 |
| 086 | ZINC000001705708 | -11.271 |
| 087 | ZINC000104207302 | -11.268 |
| 088 | ZINC000104207309 | -11.268 |
| 089 | ZINC000003057249 | -11.261 |
| 090 | ZINC000059514393 | -11.260 |
| 091 | ZINC000409357936 | -11.256 |
| 092 | ZINC000409356947 | -11.255 |
| 093 | ZINC000022608226 | -11.251 |
| 094 | ZINC000006651549 | -11.245 |
| 095 | ZINC000068568685 | -11.241 |
| 096 | ZINC000036589708 | -11.237 |
| 097 | ZINC000017311037 | -11.230 |
| 098 | ZINC000104207323 | -11.229 |
| 099 | ZINC000104207316 | -11.229 |
| 100 | ZINC000004166422 | -11.227 |
| 101 | ZINC000095869672 | -10.935 |
| 102 | ZINC000012377403 | -10.922 |
| 103 | ZINC000218224996 | -10.909 |
| 104 | ZINC000020477868 | -10.896 |
| 105 | ZINC000253534673 | -10.883 |
| 106 | ZINC000020477880 | -10.869 |
| 107 | ZINC000006763566 | -10.856 |
| 108 | ZINC000095916638 | -10.843 |
| 109 | ZINC000100643778 | -10.830 |
| 110 | ZINC000015218322 | -10.817 |
| 111 | ZINC000005853248 | -10.804 |
| 112 | ZINC000085776324 | -10.791 |
| 113 | ZINC000095916633 | -10.777 |
| 114 | ZINC000057497264 | -10.764 |
| 115 | ZINC000085776320 | -10.751 |
| 116 | ZINC000217379534 | -10.738 |
| 117 | ZINC000253629646 | -10.725 |
| 118 | ZINC000118925436 | -11.161 |
| 119 | ZINC000032508293 | -11.160 |
| 120 | ZINC000045789132 | -11.154 |
| 121 | ZINC000100006925 | -11.154 |
| 122 | ZINC000012559276 | -11.154 |
| 123 | ZINC000408718240 | -11.153 |
| 124 | ZINC000032508299 | -11.148 |
| 125 | ZINC000016990249 | -11.147 |

|     |                  |         |
|-----|------------------|---------|
| 126 | ZINC000016033727 | -11.142 |
| 127 | ZINC000005024038 | -11.141 |
| 128 | ZINC000100162630 | -11.124 |
| 129 | ZINC000409353161 | -11.123 |
| 130 | ZINC000253618165 | -11.123 |
| 131 | ZINC000019237438 | -11.122 |
| 132 | ZINC000100006436 | -11.120 |
| 133 | ZINC000409346250 | -11.118 |
| 134 | ZINC000007066199 | -11.114 |
| 135 | ZINC000408731495 | -11.113 |
| 136 | ZINC000001087348 | -11.112 |
| 137 | ZINC000005725191 | -11.109 |
| 138 | ZINC000004742460 | -11.109 |
| 139 | ZINC000104301937 | -11.106 |
| 140 | ZINC000001697065 | -11.105 |
| 141 | ZINC000409351421 | -11.102 |
| 142 | ZINC000101232459 | -11.098 |
| 143 | ZINC000102629257 | -11.096 |
| 144 | ZINC000006415633 | -11.093 |
| 145 | ZINC000004705939 | -11.092 |
| 146 | ZINC000409340652 | -11.091 |
| 147 | ZINC000006476384 | -11.090 |
| 148 | ZINC000059514550 | -11.084 |
| 149 | ZINC000094156263 | -11.083 |
| 150 | ZINC000001050326 | -11.082 |
| 151 | ZINC000247646417 | -11.082 |
| 152 | ZINC000408722162 | -11.081 |
| 153 | ZINC000034074220 | -11.079 |
| 154 | ZINC000118929793 | -11.071 |
| 155 | ZINC000032505477 | -11.064 |
| 156 | ZINC000032506879 | -11.061 |
| 157 | ZINC000409356050 | -11.060 |
| 158 | ZINC000408730299 | -11.057 |
| 159 | ZINC000004690292 | -11.056 |
| 160 | ZINC000101654670 | -11.053 |
| 161 | ZINC000096306652 | -11.052 |
| 162 | ZINC000032507412 | -11.052 |
| 163 | ZINC000096161427 | -11.051 |
| 164 | ZINC000118917616 | -11.049 |
| 165 | ZINC000096306678 | -11.048 |
| 166 | ZINC000409359534 | -11.046 |
| 167 | ZINC000409354090 | -11.046 |
| 168 | ZINC000101139397 | -11.043 |

|     |                  |         |
|-----|------------------|---------|
| 169 | ZINC000079096590 | -11.041 |
| 170 | ZINC000032508224 | -11.038 |
| 171 | ZINC000026507889 | -11.038 |
| 172 | ZINC000072351420 | -11.034 |
| 173 | ZINC000101318196 | -11.032 |
| 174 | ZINC000009287909 | -11.031 |
| 175 | ZINC000004933922 | -11.029 |
| 176 | ZINC000017054917 | -11.024 |
| 177 | ZINC000248332081 | -11.018 |
| 178 | ZINC000068601390 | -11.016 |
| 179 | ZINC000032508222 | -11.016 |
| 180 | ZINC000409353566 | -11.012 |
| 181 | ZINC000252515700 | -11.009 |
| 182 | ZINC000118926369 | -11.009 |
| 183 | ZINC000104002935 | -11.007 |
| 184 | ZINC000003080766 | -11.005 |
| 185 | ZINC000105492283 | -11.003 |
| 186 | ZINC000118929318 | -11.000 |
| 187 | ZINC000012558757 | -11.000 |
| 188 | ZINC000409288042 | -10.998 |
| 189 | ZINC000037263681 | -10.997 |
| 190 | ZINC000012558795 | -10.996 |
| 191 | ZINC000012284765 | -10.996 |
| 192 | ZINC000253617332 | -10.994 |
| 193 | ZINC000004897164 | -10.991 |
| 194 | ZINC000017032133 | -10.990 |
| 195 | ZINC000041589287 | -10.988 |
| 196 | ZINC000118915169 | -10.987 |
| 197 | ZINC000409353866 | -10.983 |
| 198 | ZINC000408720985 | -10.983 |
| 199 | ZINC000253476472 | -10.981 |
| 200 | ZINC000118929733 | -10.978 |

**Table S3.** Hydrogen bonding analysis of molecules obtained from virtual screening with CDK9. The hydrogen bonding interaction was judged by the distance between hydrogen bond donor and acceptor within 3.5 Å and the hydrogen bonding angle greater than 135°.

| Ligand | Acceptor    | Donor       | Fraction | Distance(Å) | Angle(°) |
|--------|-------------|-------------|----------|-------------|----------|
| 006    | 006@N6      | CYS_106@N   | 0.81     | 3.21        | 158.28   |
|        | ASP_109@OD2 | 006@N4      | 0.56     | 3.02        | 147.13   |
|        | ASP_109@OD1 | 006@N4      | 0.53     | 3.02        | 146.66   |
|        | ASP_109@OD2 | 006@N3      | 0.45     | 2.90        | 153.01   |
|        | 006@N7      | CYS_106@N   | 0.44     | 3.29        | 151.77   |
|        | ASP_109@OD1 | 006@N3      | 0.43     | 2.90        | 153.14   |
| 008    | 008@O2      | CYS_106@N   | 0.87     | 3.08        | 159.08   |
|        | 008@F1      | ASP_167@N   | 0.05     | 3.14        | 141.21   |
| 149    | 149@O3      | CYS_106@N   | 0.88     | 3.03        | 158.61   |
|        | 149@O4      | ASP_167@N   | 0.76     | 3.08        | 157.04   |
|        | 149@N1      | ASP_109@N   | 0.66     | 3.26        | 154.52   |
|        | 149@O5      | ASN_116@ND2 | 0.43     | 3.02        | 157.51   |
| 052    | CYS_106@O   | 052@N3      | 0.97     | 2.80        | 160.62   |
|        | 052@O1      | CYS_106@N   | 0.89     | 3.06        | 157.27   |
|        | GLY_31@O    | 052@N4      | 0.11     | 2.94        | 146.54   |
| 124    | 124@O2      | GLN_27@N    | 0.40     | 2.97        | 160.64   |
|        | 124@O2      | GLN_27@NE2  | 0.02     | 2.97        | 155.54   |
|        | 124@O3      | CYS_106@N   | 0.01     | 2.99        | 157.67   |



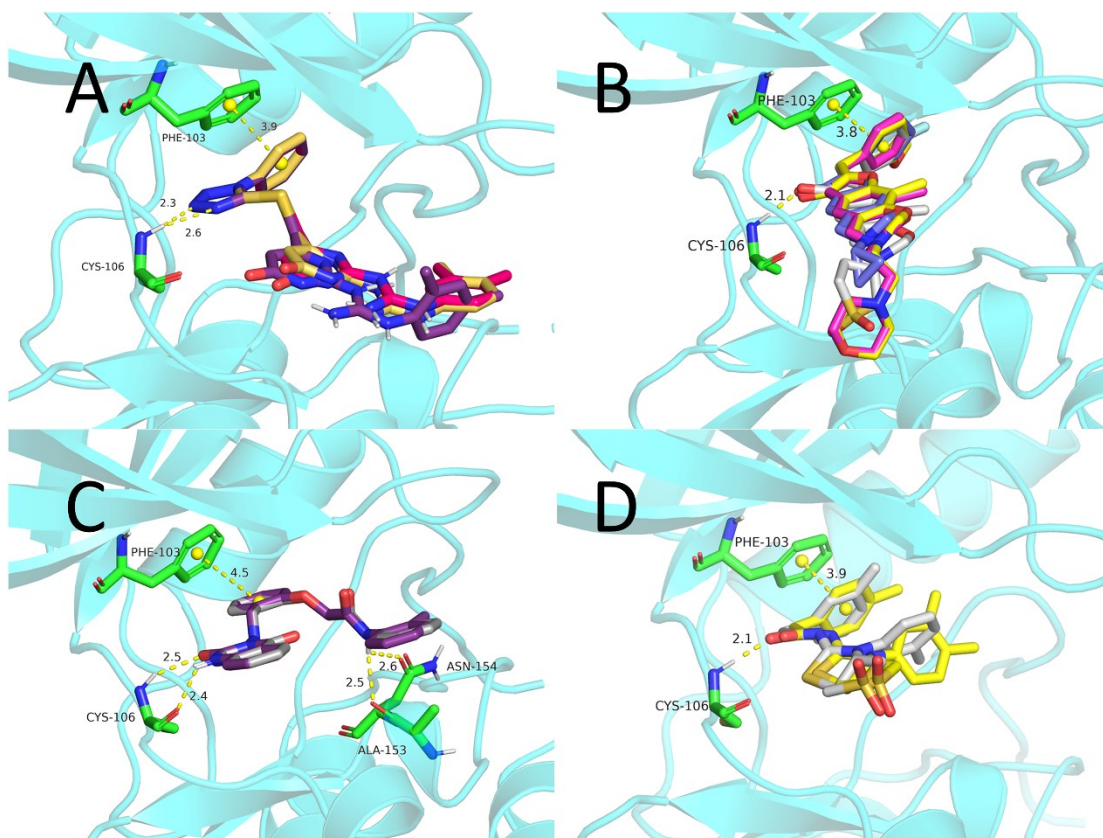

**Fig. S1** Binding modes of the four types of molecular structures at the ATP-binding site, the backbone structures of the same class of molecules basically overlap. hydrogen bonding and  $\pi - \pi$  stacking are indicated by the yellow dashed line.

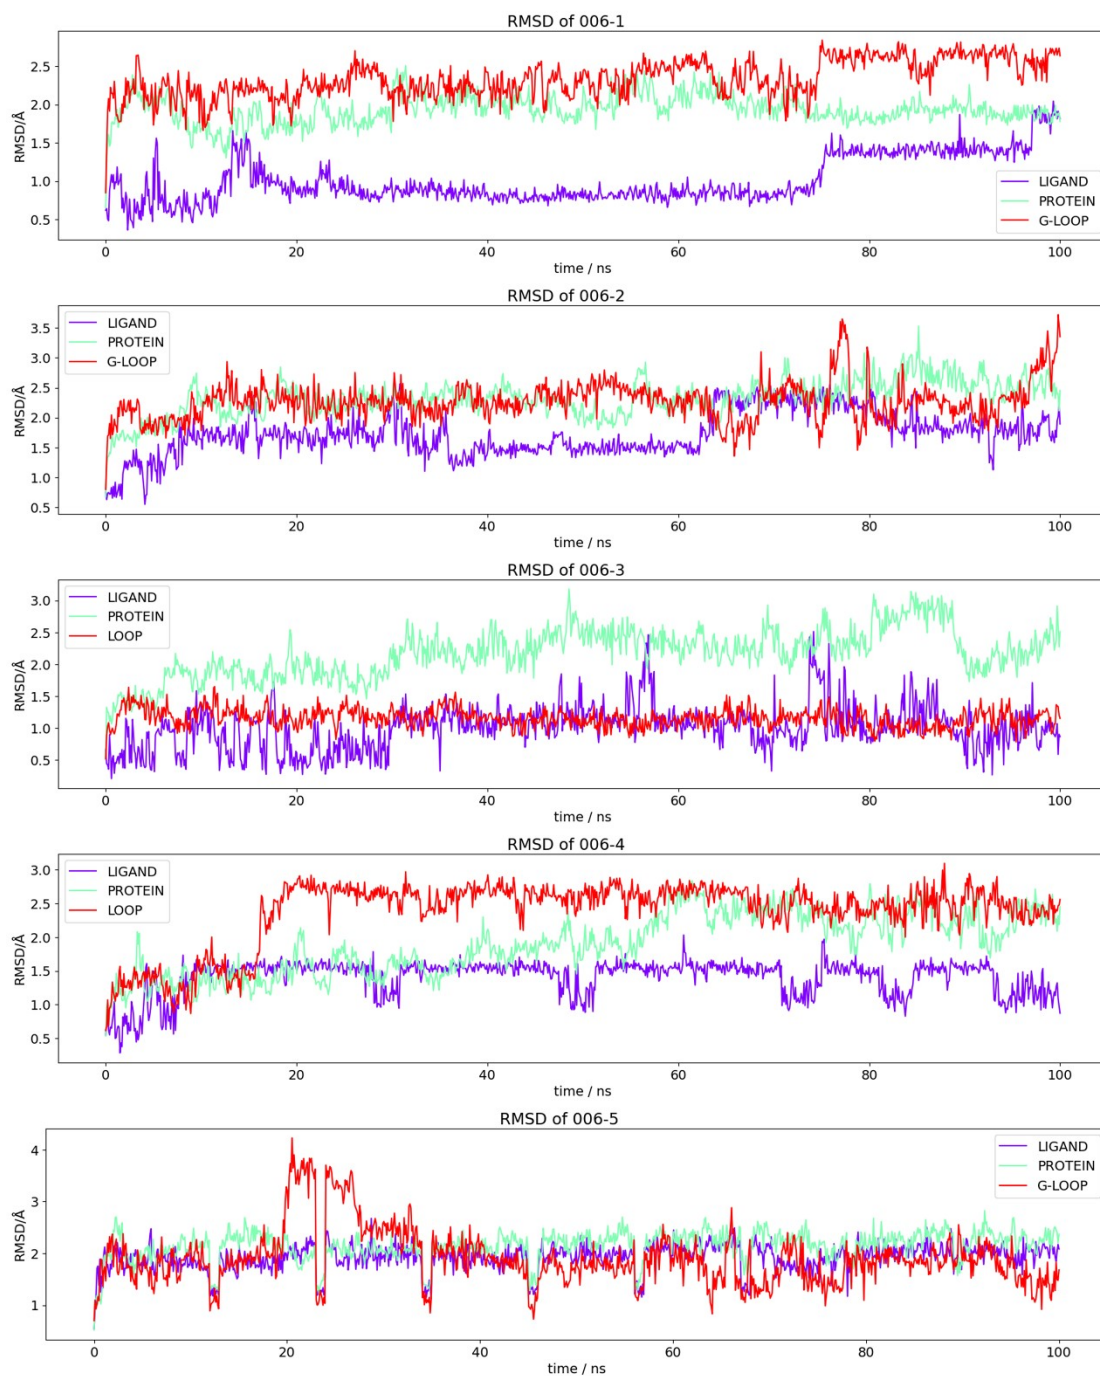

**Fig. S2** RMSD of molecules in complex with CDK9, ligands, protein backbone atoms and G-loop non-hydrogen heavy atoms indicated in purple, green and red, respectively.

**Table S4.** Hydrogen bonding analysis of molecules obtained from structure modification with CDK9. The hydrogen bonding interaction was judged by the distance between hydrogen bond donor and acceptor within 3.5 Å and the hydrogen bonding angle greater than 135°.

| Ligand | Acceptor    | Donor     | Fraction | Distance(Å) | Angle(°) |
|--------|-------------|-----------|----------|-------------|----------|
| 006    | 006@N6      | CYS_106@N | 0.81     | 3.21        | 158.28   |
|        | ASP_109@OD2 | 006@N4    | 0.56     | 3.02        | 147.13   |
|        | ASP_109@OD1 | 006@N4    | 0.53     | 3.02        | 146.66   |
|        | ASP_109@OD2 | 006@N3    | 0.45     | 2.90        | 153.01   |
|        | 006@N7      | CYS_106@N | 0.44     | 3.29        | 151.77   |
|        | ASP_109@OD1 | 006@N3    | 0.43     | 2.90        | 153.14   |
| 006-1  | 006-1@N6    | CYS_106@N | 0.65     | 3.14        | 158.91   |
|        | 006-1@N7    | CYS_106@N | 0.33     | 3.30        | 150.54   |
|        | 006-1@N8    | CYS_106@N | 0.12     | 3.26        | 152.69   |
|        | ALA_153@O   | 006-1@N5  | 0.09     | 2.99        | 154.91   |
|        | ALA_153@O   | 006-1@N5  | 0.05     | 2.95        | 155.30   |
| 006-2  | ALA_153@O   | 006-2@N2  | 0.33     | 3.00        | 155.80   |
|        | ALA_153@O   | 006-2@N2  | 0.29     | 2.99        | 155.66   |
|        | ASP_109@OD2 | 006-2@N2  | 0.29     | 2.90        | 159.45   |
|        | ASP_109@OD2 | 006-2@N2  | 0.27     | 2.90        | 159.14   |
|        | 006-2@N7    | CYS_106@N | 0.27     | 3.31        | 153.65   |
|        | 006-2@N8    | CYS_106@N | 0.25     | 3.27        | 154.36   |
|        | 006-2@N6    | CYS_106@N | 0.21     | 3.24        | 160.53   |
| 006-3  | 006-3@N6    | CYS_106@N | 0.63     | 3.21        | 155.33   |
|        | ASP_109@OD1 | 006-3@N3  | 0.56     | 2.78        | 162.55   |
|        | ASP_109@OD2 | 006-3@N3  | 0.45     | 2.79        | 162.38   |
|        | 006-3@N7    | CYS_106@N | 0.36     | 3.28        | 153.74   |
|        | ASP_109@OD1 | 006-3@N1  | 0.30     | 2.95        | 152.13   |
|        | ASP_109@OD2 | 006-3@N1  | 0.27     | 2.94        | 152.84   |
| 006-4  | 006-4@N6    | CYS_106@N | 0.87     | 3.17        | 158.13   |
|        | ASP_109@OD1 | 006-4@N1  | 0.61     | 2.94        | 152.79   |
|        | ASP_109@OD2 | 006-4@N1  | 0.58     | 2.97        | 152.19   |
|        | ASP_109@OD2 | 006-4@N3  | 0.53     | 2.82        | 159.14   |
|        | 006-4@N7    | CYS_106@N | 0.49     | 3.30        | 154.66   |
|        | ASP_109@OD1 | 006-4@N3  | 0.48     | 2.81        | 158.90   |
| 006-5  | 006-5@N6    | CYS_106@N | 0.80     | 3.21        | 159.93   |
|        | ILE_25@O    | 006-5@N3  | 0.78     | 2.91        | 155.99   |
|        | 006-5@N7    | CYS_106@N | 0.23     | 3.36        | 151.12   |
|        | 006-5@O1    | ASP_109@N | 0.03     | 3.22        | 142.81   |

**Table S5.** The results of ABFE calculations for the structures in **Fig.6**. Data were analyzed by the MBAR method, using three independent calculations to obtain the mean with standard deviation, and all data are in kcal/mol.

| ligand | $\Delta G_{\text{solution}}^{\text{decouple}}$ | $-\Delta G_{\text{site}}^{\text{decouple}}$ | $\Delta G_{\text{solution}}^{\text{restraint}} - k_B T \ln n$ | $\Delta G_{\text{site}}^{\text{restraint}}$ | $\Delta G_b^\circ$ | $\Delta G_b^\circ(\text{average})$ |
|--------|------------------------------------------------|---------------------------------------------|---------------------------------------------------------------|---------------------------------------------|--------------------|------------------------------------|
| 006    | 39.2                                           | -58.5                                       |                                                               | -3.2                                        | -11.0              |                                    |
|        | 39.4                                           | -58.9                                       | 11.421                                                        | -3.1                                        | -11.3              | $-10.7 \pm 0.7$                    |
|        | 39.2                                           | -57.5                                       |                                                               | -3.1                                        | -9.9               |                                    |
| 006-1  | 35.9                                           | -55.2                                       |                                                               | -3.9                                        | -11.1              |                                    |
|        | 36.1                                           | -54.0                                       | 12.021                                                        | -4.0                                        | -9.8               | $-10.5 \pm 0.7$                    |
|        | 35.9                                           | -54.8                                       |                                                               | -3.8                                        | -10.7              |                                    |
| 006-2  | 36.2                                           | -54.5                                       |                                                               | -3.4                                        | -10.7              |                                    |
|        | 34.6                                           | -56.1                                       | 10.962                                                        | -3.5                                        | -14.0              | $-10.6 \pm 3.4$                    |
|        | 35.7                                           | -50.5                                       |                                                               | -3.4                                        | -7.2               |                                    |
| 006-3  | 21.3                                           | -44.8                                       |                                                               | -3.2                                        | -15.3              |                                    |
|        | 21.7                                           | -44.0                                       | 11.439                                                        | -3.2                                        | -14.1              | $-14.4 \pm 0.7$                    |
|        | 21.6                                           | -43.8                                       |                                                               | -3.1                                        | -13.9              |                                    |
| 006-4  | 25.4                                           | -45.7                                       |                                                               | -4.7                                        | -13.2              |                                    |
|        | 26.2                                           | -46.6                                       | 11.784                                                        | -4.4                                        | -12.9              | $-12.9 \pm 0.4$                    |
|        | 25.3                                           | -45.2                                       |                                                               | -4.4                                        | -12.5              |                                    |
| 006-5  | 22.2                                           | -43.6                                       |                                                               | -4.5                                        | -13.7              |                                    |
|        | 22.7                                           | -42.6                                       | 12.115                                                        | -4.5                                        | -12.2              | $-12.7 \pm 1.1$                    |
|        | 22.5                                           | -41.7                                       |                                                               | -4.5                                        | -11.3              |                                    |

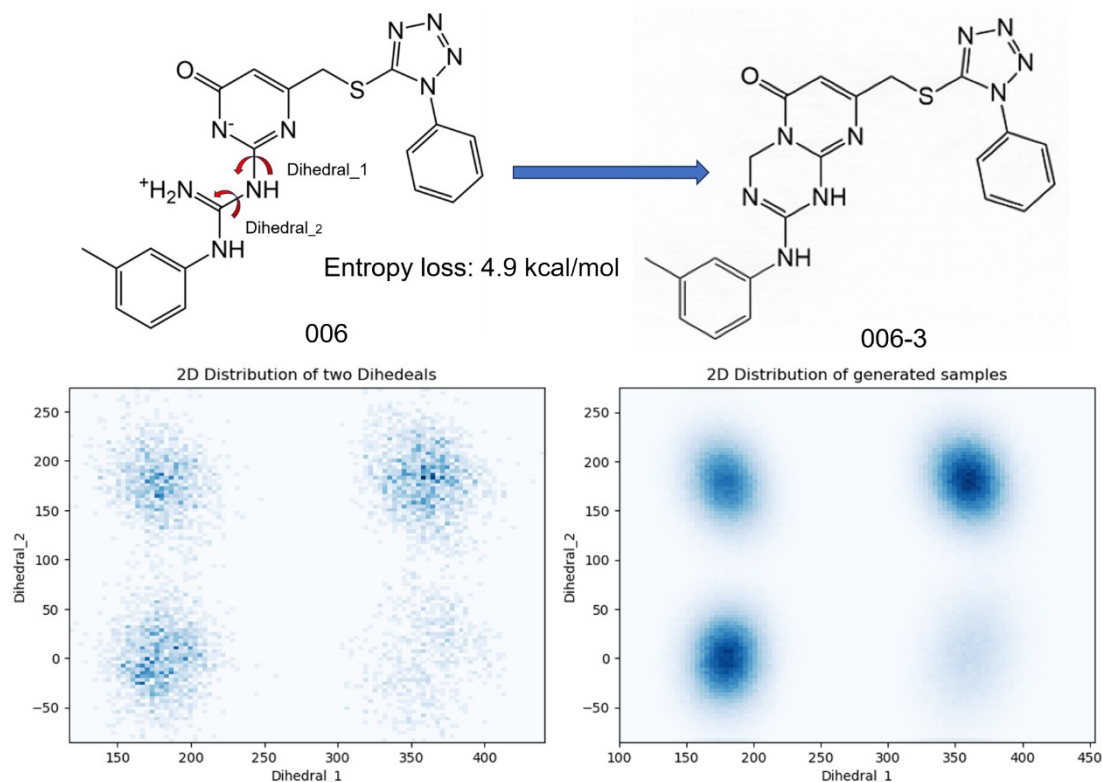

**Fig. S3** Entropy loss estimation through conformational flexibility. To quantify the impact of entropy change, the distribution of two dihedral angles (highlighted with red arrows) of the 006 molecule in solution were sampled. The angles were projected onto a two-dimensional plane and underwent periodic transformations, revealing four concentrated regions. After fitting the data using a Gaussian Mixture Model (GMM) with four components from the scikit-learn library, the model-generated data distribution closely matched the original distribution, indicating a good fit. All sampled points were input into the GMM model, and the probabilities were normalized.

$$S = -kT \sum_i p_i \ln(p_i)$$

Calculations using the formula for entropy ( ) revealed that fixing these two dihedral angles upon intramolecular cyclization results in an entropy change of 4.9 kcal/mol at room temperature. Considering that the binding affinity of 006-3 has increased by 3.7 kcal/mol compared to 006, the reduction in the entropy of these two dihedral angles has indeed contributed significantly to the enhancement of binding free energy.
